# Supplementary material
Source: PubMed Central journal article supplement (PMC4130803)
Supplement: NIHMS567946-supplement-01.pdf [file NIHMS567946-supplement-01.pdf]

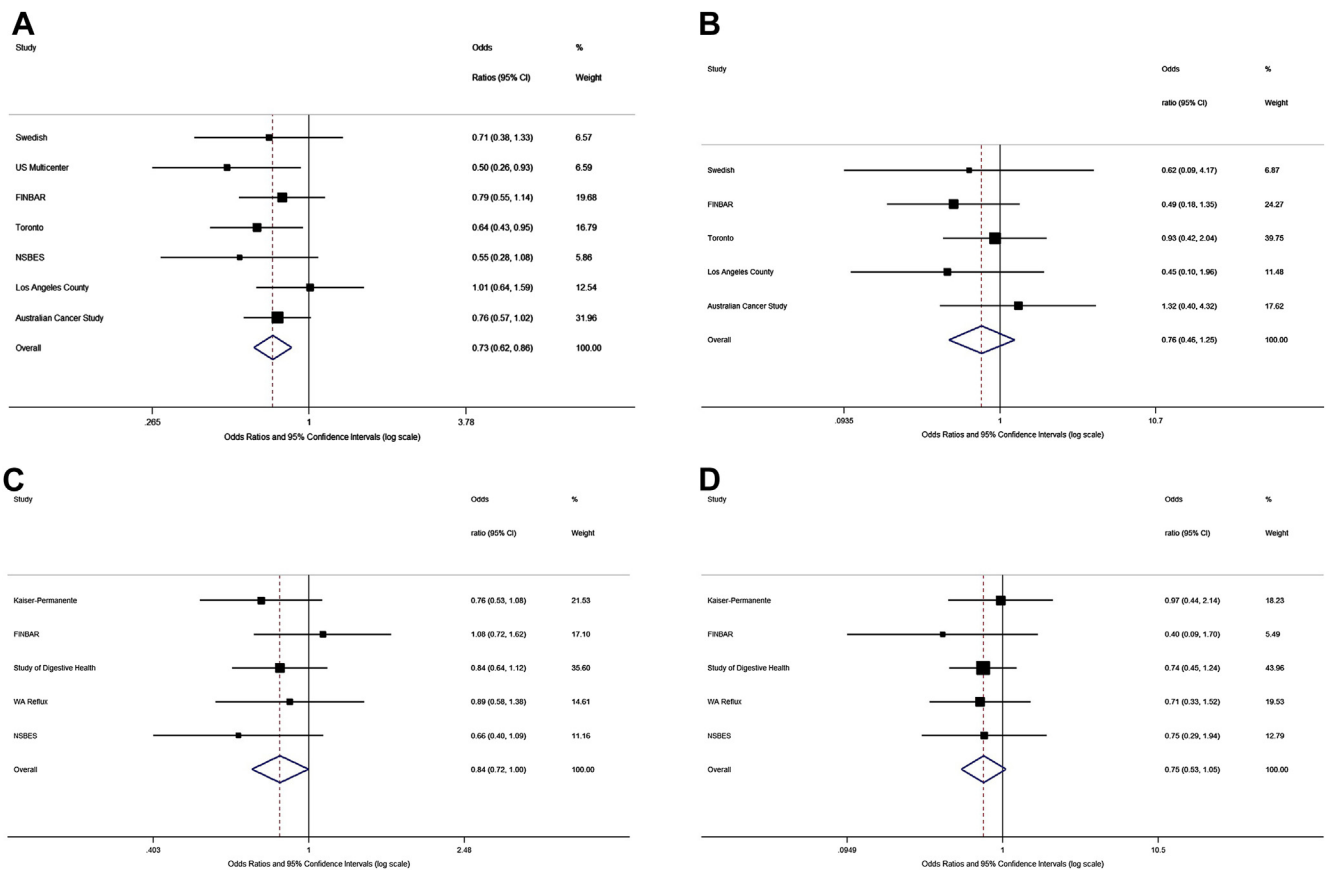

**Supplementary Figure 1.** The summary ORs and 95% CIs (per 10-cm increase) for associations between height and risks of EAC and BE. (A) EAC in males, (B) EAC in females, (C) BE in males, and (D) BE in females. Summary estimates were obtained using a random-effects meta-analytic model. All statistical tests were 2-sided. % Weight describes the weighting each study contributes to the summary OR. FINBAR, Factors Influencing the Barrett's Adenocarcinoma Relationship; NSBES, Nova Scotia Barrett Esophagus Study.
